# Supplementary material
Source: publisher figshare collection journal article supplement (https://acs.figshare.com/ndownloader/files/13007915)
Supplement: Supplementary file 1 [file 13007915]

## **Supporting Information**

### **Metallic Transition Metal Dichalcogenide Nanosheets as an Effective and Biocompatible Transducer for Electrochemical Detection of Pesticide**

Fengnian Zhao, Yao Yao, Xunjia Li, Lingyi Lan, Chengmei Jiang, Jianfeng Ping\*

School of Biosystems Engineering and Food Science, Zhejiang University, 866 Yuhangtang Road,

Hangzhou 310058, P.R. China

Corresponding author: Prof. Jianfeng Ping

*E-mail:* [jfping@zju.edu.cn](mailto:jfping@zju.edu.cn)

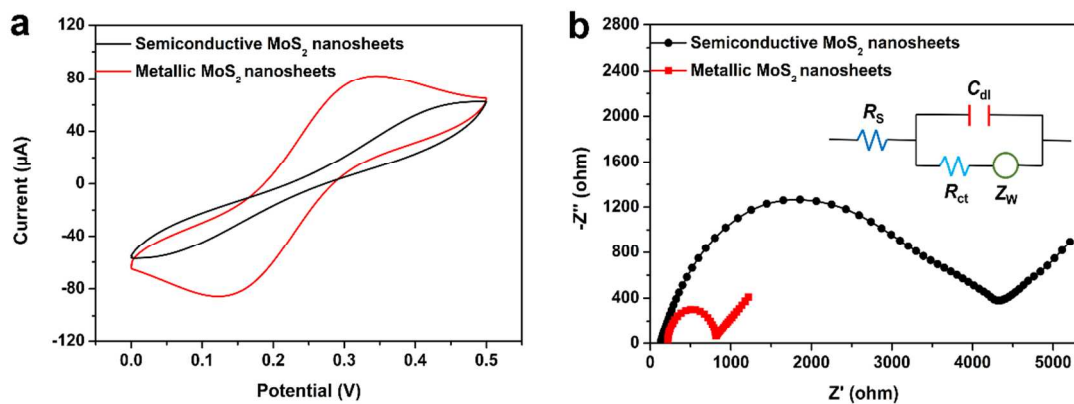

**Figure S1.** (a) CV and (b) EIS of semiconductive  $\text{MoS}_2$  (2H-phase) and metallic  $\text{MoS}_2$  (1T-phase dominated) modified SPE in 0.1 M KCl solution containing 5.0 mM  $\text{K}_3[\text{Fe}(\text{CN})_6]$ . For CV, the experimental conditions were as follows: scan potential from 0 to +0.5 V, scan rate is  $0.1 \text{ V s}^{-1}$ . For EIS, the experimental conditions were as follows: frequency ranges from 100 kHz to 0.01 Hz, and AC amplitude is 5 mV.

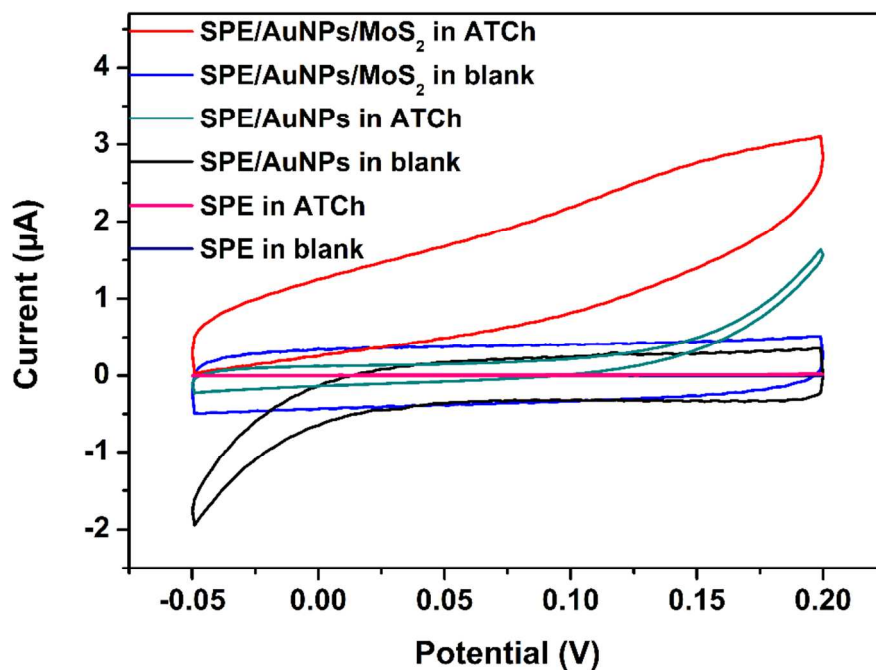

**Figure S2.** CV response of bare SPE, SPE/AuNPs, and SPE/AuNPs/MoS<sub>2</sub> with/without the addition of 500 µM ATCh. The experimental conditions were as follows: scan potential is from – 0.05 to +0.2 V, scan rate is 0.02 V s<sup>-1</sup>, and electrolyte is 0.01 M PBS (pH 7.4).

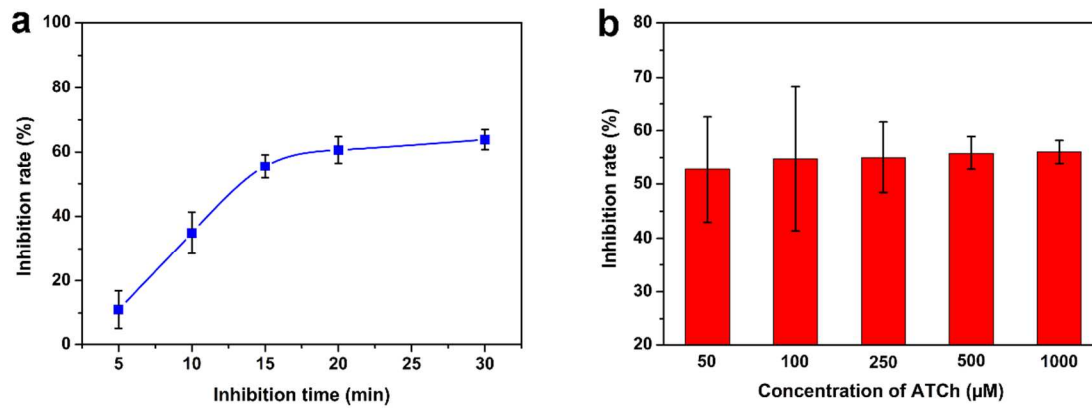

**Figure S3.** Optimization of (a) paraoxon inhibition time and (b) ATCh concentration.

**Table S1.** Comparison of different sensors for the detection of organophosphorus pesticides.

| Sensor                                                | Method       | Pesticide        | Linear range                 | LOD      | Ref.      |
|-------------------------------------------------------|--------------|------------------|------------------------------|----------|-----------|
| GCE/WS <sub>2</sub> /GA/AChE                          | Amperometry  | fenitrothion     | 1.0–1000 nM                  | 2.86 nM  | 1         |
| GCE/MoS <sub>2</sub> -GR                              | Amperometry  | methyl parathion | 10–1.9×10 <sup>6</sup> nM    | 3.23 nM  | 2         |
| SPE/GR/Fe <sub>3</sub> O <sub>4</sub> NPs+CS/A<br>ChE | DPV          | chlorpyrifos     | 0.1–285 nM                   | 0.06 nM  | 3         |
| MoS <sub>2</sub> QDs                                  | Fluorescence | methyl parathion | 379.9–1.1×10 <sup>5</sup> nM | 322.9 nM | 4         |
| SPE/AuNPs/MoS <sub>2</sub> /GA/A<br>ChE               | Amperometry  | paraoxon         | 3.6–3634 nM                  | 0.04 nM  | This work |

GCE: glassy carbon electrode; GR: graphene; Fe<sub>3</sub>O<sub>4</sub>NPs: magnetic nanoparticles; CS: chitosan; DPV: differential pulse voltammetry; QDs: quantum dots.

## REFERENCES

- (1) Nasir, M. Z. M.; Mayorga-Martinez, C. C.; Sofer, Z.; Pumera, M. *ACS Nano* **2017**, *11*, 5774-5784.
- (2) Govindasamy, M.; Chen, S. M.; Mani, V.; Akilarasan, M.; Kogularasu, S.; Subramani, B. *Microchim. Acta* **2017**, *184*, 725-733.
- (3) Wang, H.; Zhao, G.; Chen, D. F.; Wang, Z. Q.; Liu, G. *Int. J. Electrochem. Sci.* **2016**, *11*, 10906-10918.
- (4) Fahimi-Kashani, N.; Rashti, A.; Hormozi-Nezhad, M. R.; Mahdavi, V. *Anal. Methods* **2017**, *9*, 716-723.
